# Supplementary material for: Novel Exopolysaccharide from Marine Bacillus subtilis with Broad Potential Biological Activities: Insights into Antioxidant, Anti-Inflammatory, Cytotoxicity, and Anti-Alzheimer Activity
Source: MDPI journal article supplement (doi:10.3390/metabo12080715), 2022-07-31
Supplement: s1 [file s1]

## **Supplementary Information**

# **Novel Exopolysaccharide from Marine *Bacillus subtilis* with Broad Potential Biological Activities: Insights into Antioxidant, Anti-Inflammatory, Cytotoxicity, and Anti-Alzheimer Activity**

Basel A. Abdel-Wahab <sup>1,2</sup>, Hanaa F. Abd El-Kareem <sup>3</sup>, Ahmad Alzamami <sup>4</sup>, Cinderella A. Fahmy <sup>5,6</sup>, Basem H. Elesawy <sup>7</sup>, Maged Mostafa Mahmoud <sup>8,9,10</sup>, Ahmed Ghareeb <sup>11</sup>, Ahmad El Askary <sup>12</sup>, Hebatallah H. Abo Nahas <sup>13</sup>, Nashwah G. M. Attallah <sup>14</sup>, Najla Altwaijry <sup>14</sup> and Essa M. Saied <sup>15,16,\*</sup>

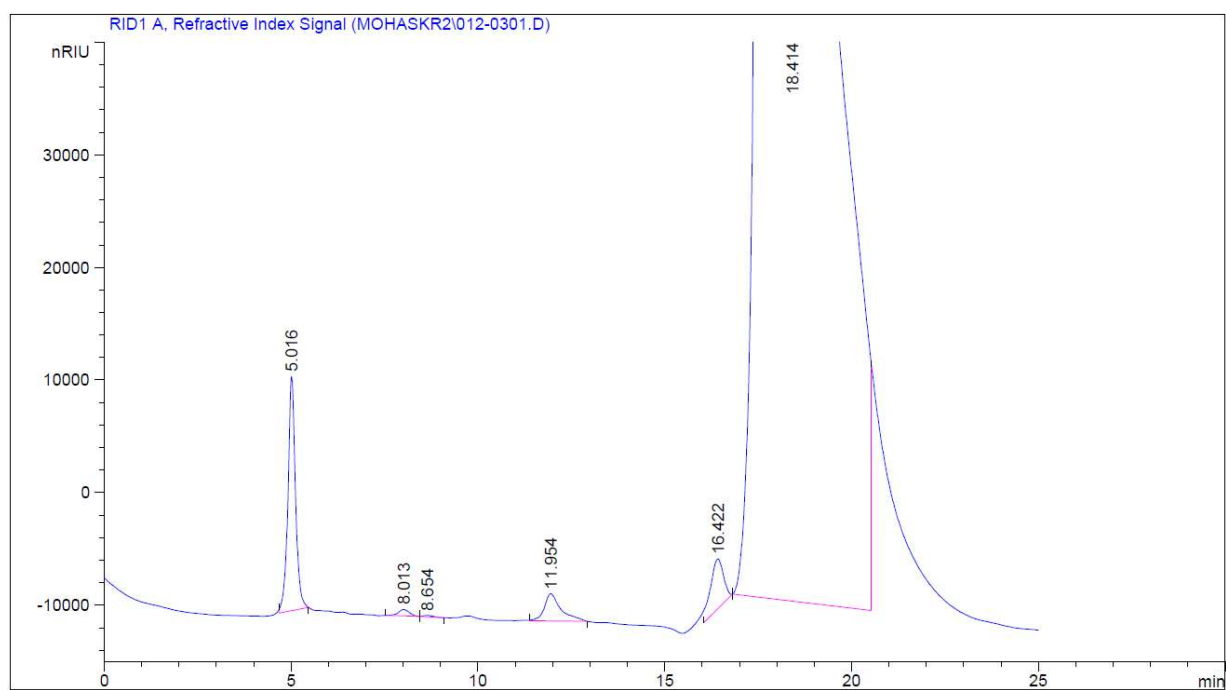

**Figure S1:** HPLC analysis of the EPSR4.

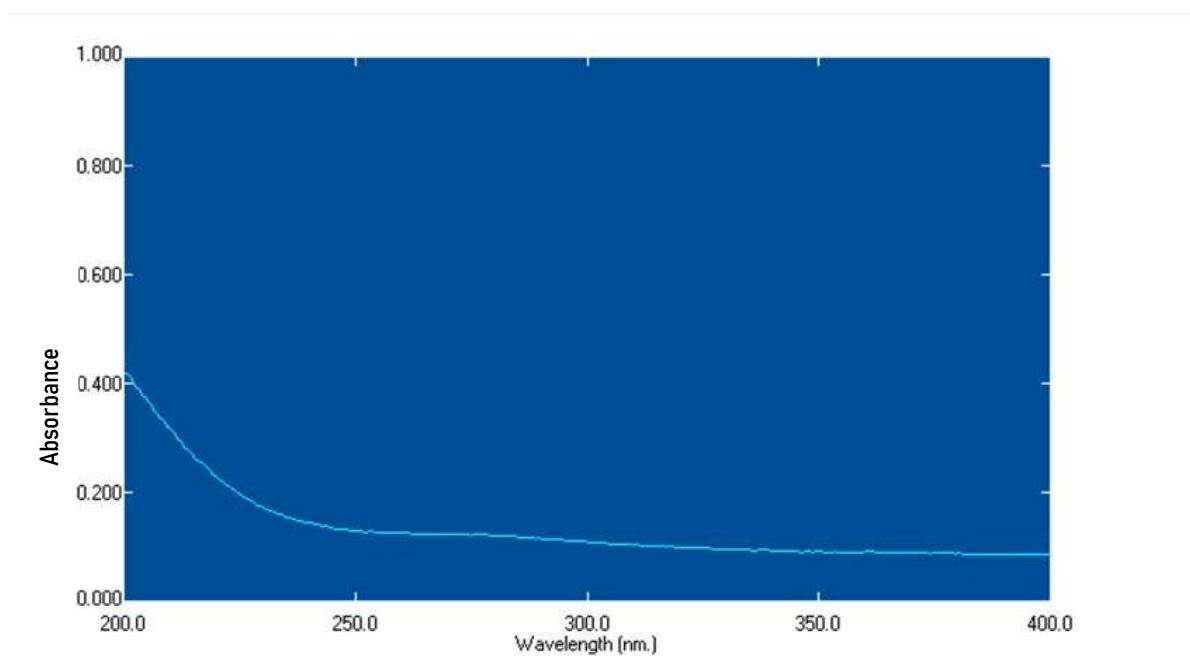

**Figure S2:** The UV spectra of EPSR4 in the range 200-800 nm.

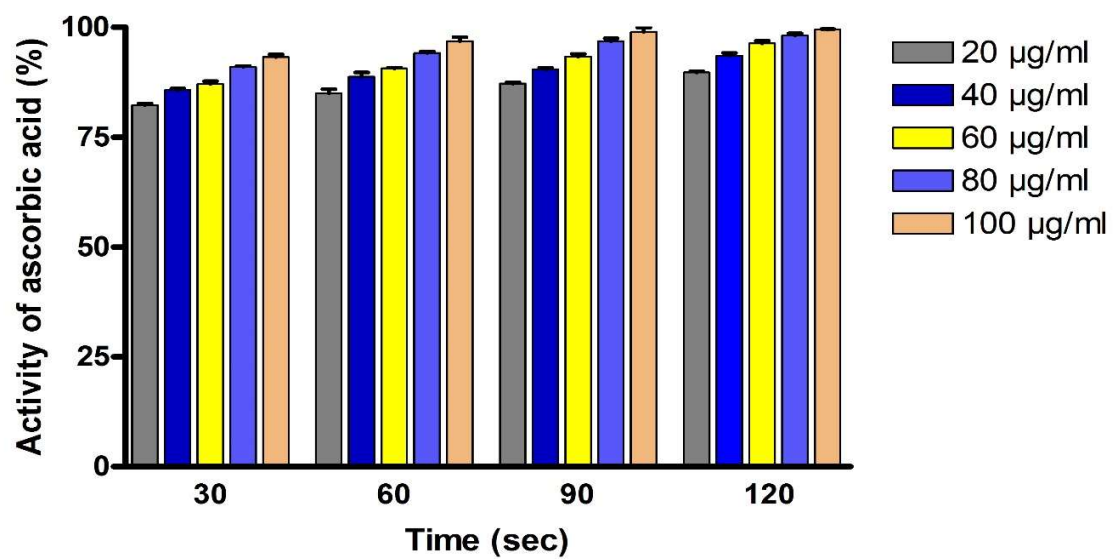

**Figure S3:** The activity of ascorbic acid to scavenge the free radical of DPPH at different time intervals.

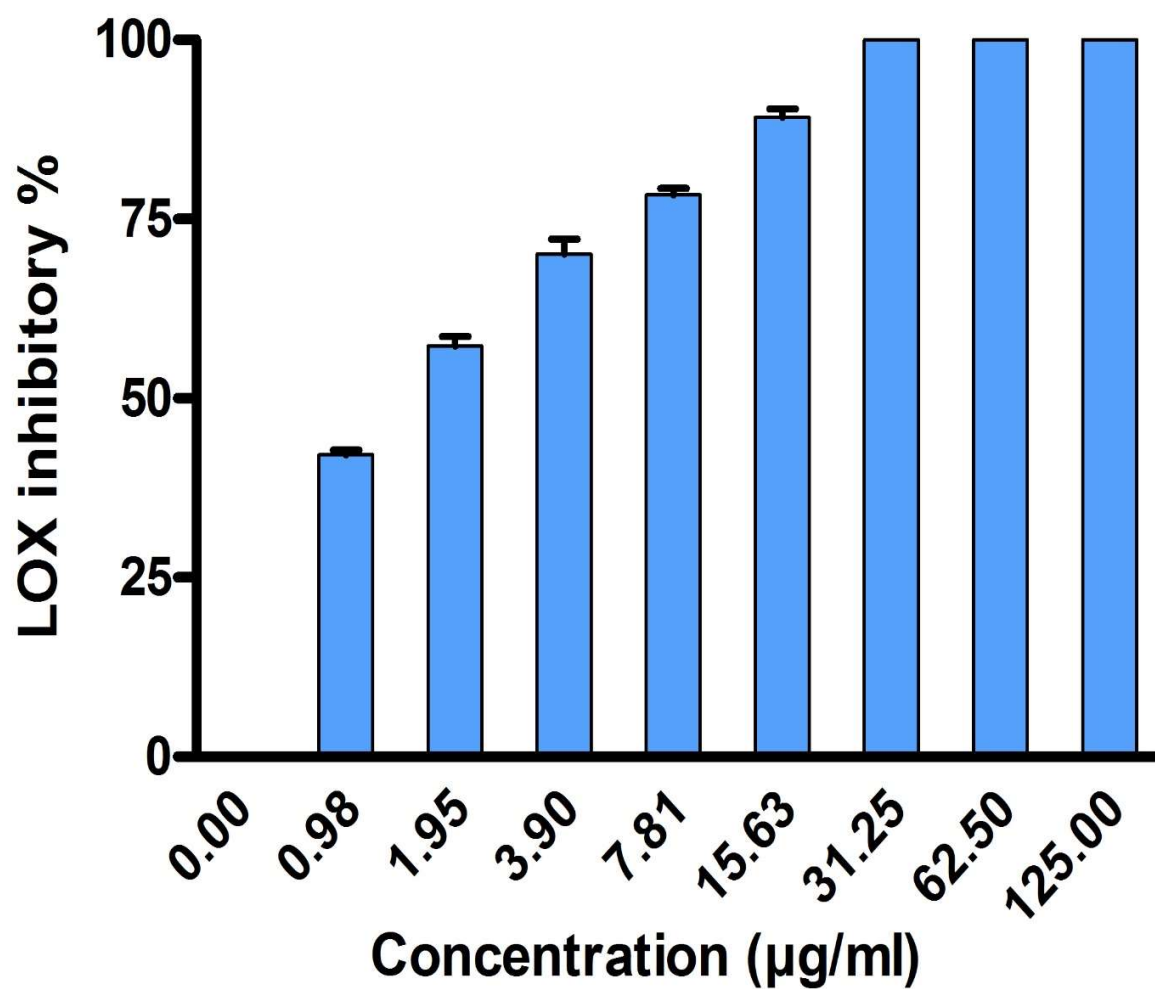

**Figure S4:** The inhibitory activity of ibuprofen against 5-LOX enzymatic activity.

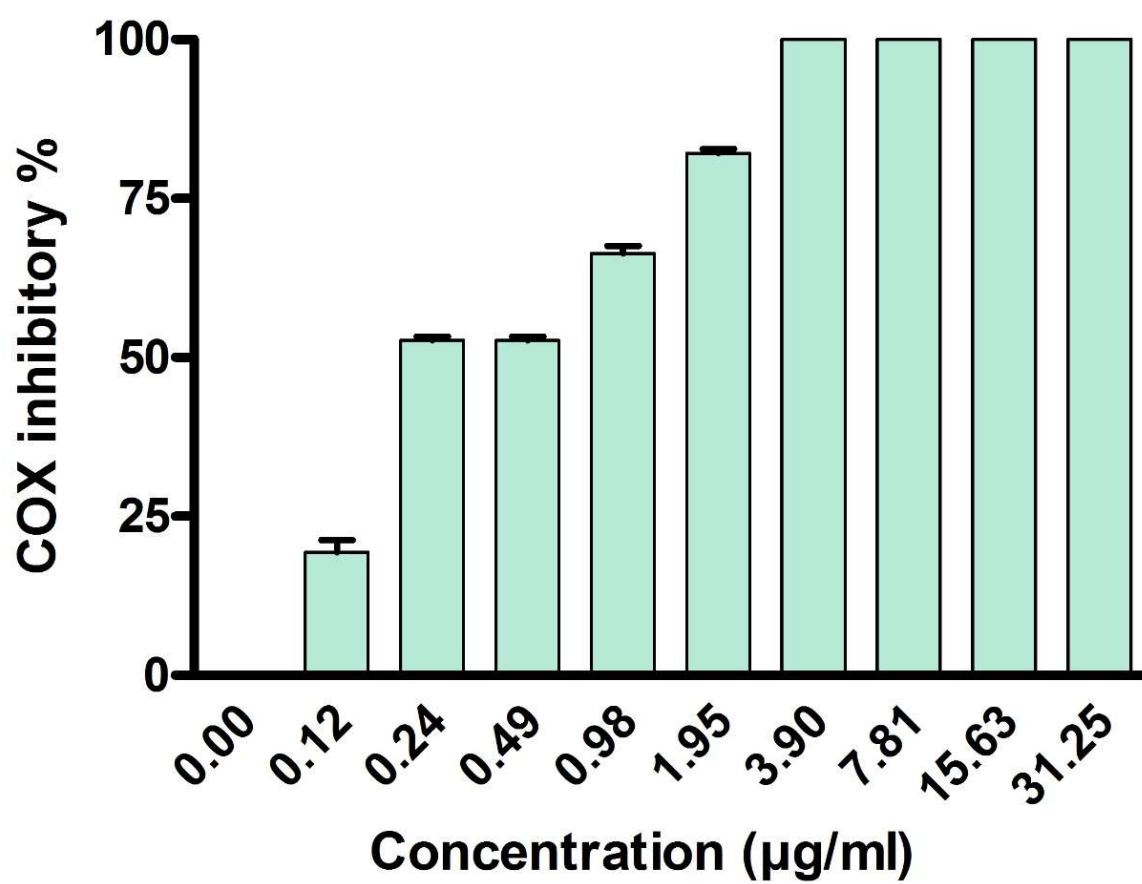

**Figure S5:** The inhibitory activity of celecoxib against COX-2 enzymatic activity.

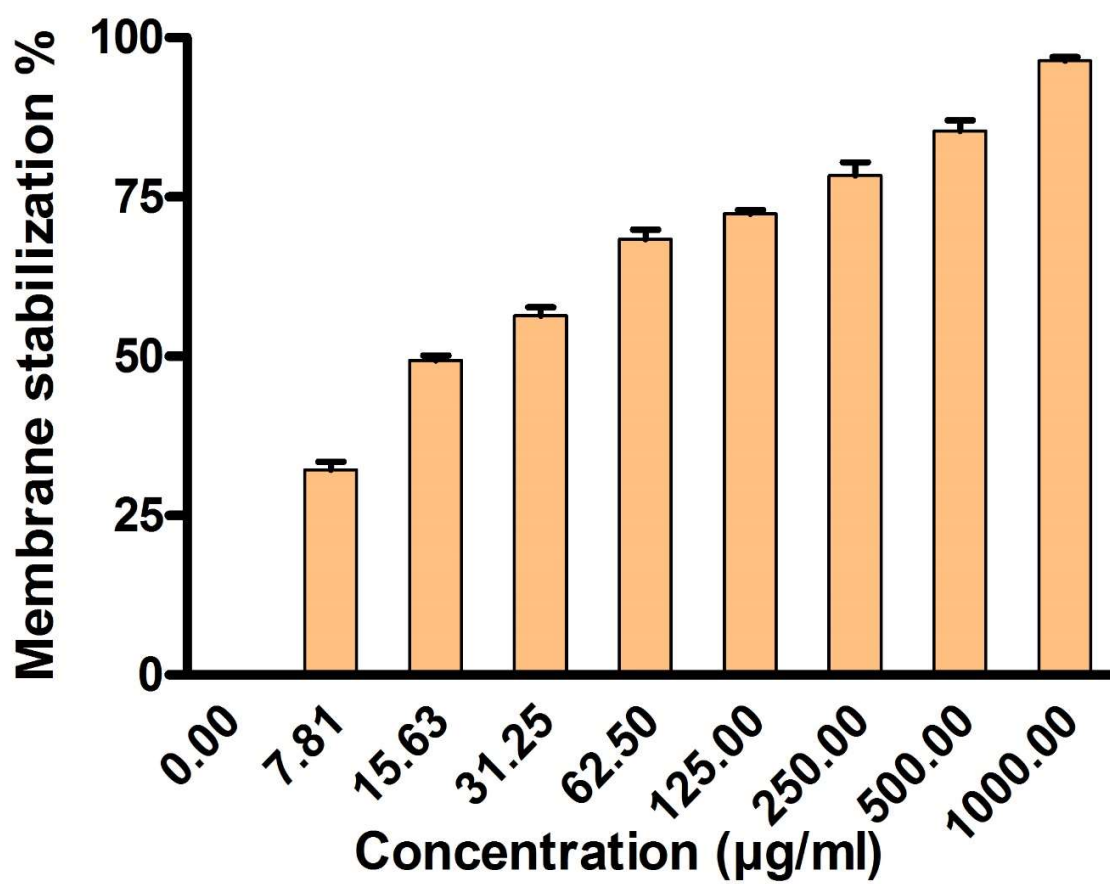

**Figure S6:** The inhibitory activity of indomethacin against hemolysis activity (membrane stability).

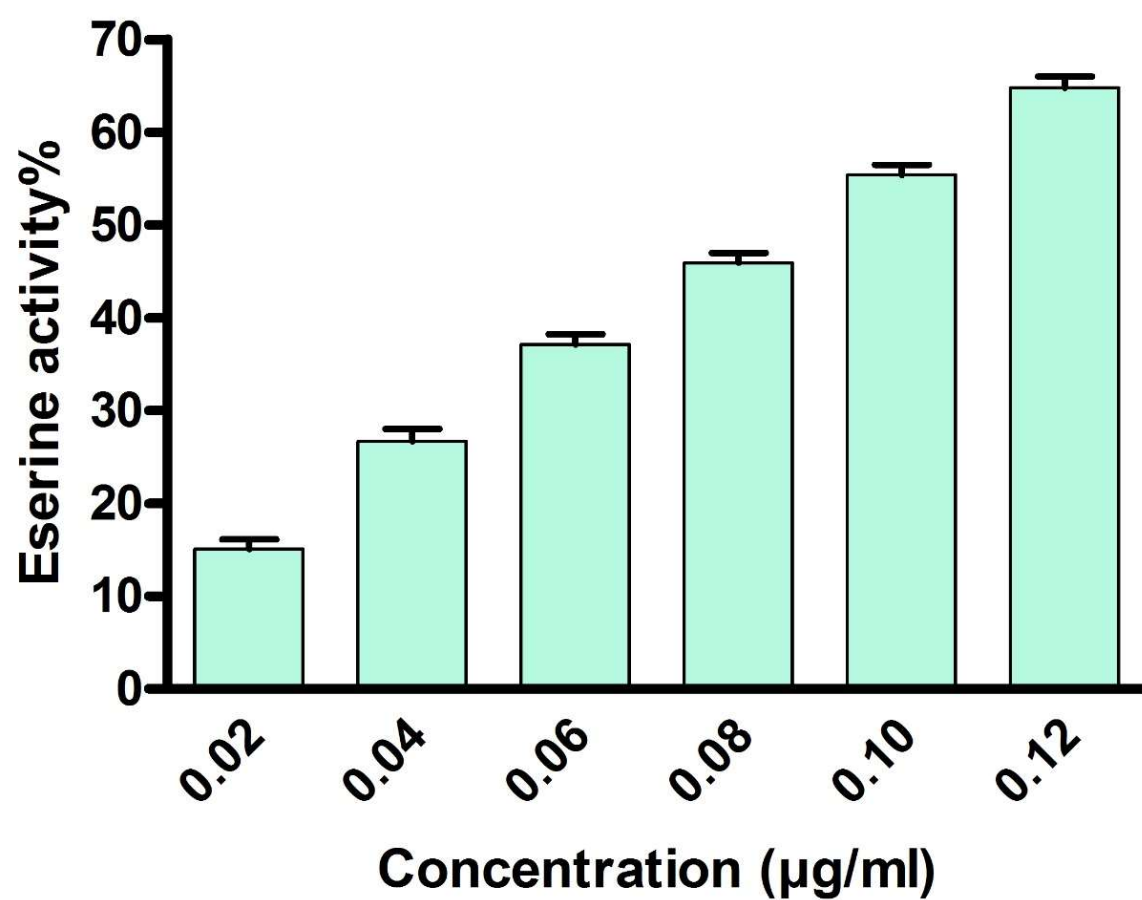

**Figure S7:** The inhibitory activity of Eserine against acetylcholinesterase activity.
